# Supplementary material for: Emergence of Highly Pathogenic Avian Influenza A Virus (H5N1) of Clade 2.3.4.4b in Egypt, 2021–2022
Source: MDPI journal article supplement (doi:10.3390/pathogens12010090), 2023-01-05
Supplement: s1 [file s1]

## Supplementary tables and figures for manuscript:

### Emergency and genetic characterization of Highly Pathogenic influenza A(H5N1) virus of clade 2.3.4.4 in Egypt, 2021-2022

**Supplementary table S1.** Primers and probes used for RT-PCR identification of viruses in collected samples.

| ID                    | Primer sequences                                                                                                                         | Reference           |
|-----------------------|------------------------------------------------------------------------------------------------------------------------------------------|---------------------|
| <b>AIV-M-gene</b>     | sep1: AGATGAGTCTTCTAACCGAGGTCG<br>sep2: TGCAAAAACATCTTCAAGTCTCTG<br>sep-probe: FAM-TCAGGCCCCCTCAAAGCCGA-TAMRA                            | <a href="#">[1]</a> |
| <b>AIV-H5 subtype</b> | H5LH1: ACATATGACTACCCACARTATTTCAG<br>H5RH1: AGACCAGCTAYCATGATTGC<br>H5PRO: FAM-TCWACAGTGGCGAGTTCCTAGCA-TAMRA                             | <a href="#">[2]</a> |
| <b>AIV-H6 subtype</b> | IAV-H6-1666F: CTTGGTGTGTATCAAATYCTTGC<br>IAV-H6-1776R: CATTGARCCATTTGARCACATCCA<br>IAV-H6-1693: FAM-TATAGTACGGTATCGAGCAGYCT-MGB          | <a href="#">[3]</a> |
| <b>AIV-H9 subtype</b> | For: GGAAGAATTAATTATTATTGGTCGGTAC<br>Rev: GCCACCTTTTTTCAGTCTGACATT<br>H9 probe: FAM-AACCAGGCCAGACATTGCGAGTAAGATCC-TAMRA                  | <a href="#">[4]</a> |
| <b>AIV-N1 subtype</b> | N1 forward: TAYAACTCAAGGTTTGAGTCTGTYGCTTG<br>N1 reverse: ATGTTRTTCCTCCAACCTCTTGATRGTGTC<br>N1-Probe: FAM-TCAGCRAGTGCTTGCCATGATGGCA-TAMRA | <a href="#">[3]</a> |
| <b>AIV-N2 subtype</b> | FN2: TGGACAGGGAACAACACTAAA C<br>RN2: ACAAGCCTCCCATCGTAAAT<br>N2-Probe: TXRED-CAAAATGAAATGGAACACCCAACTCAT-BHQ23                           | <a href="#">[3]</a> |
| <b>AIV-N8 subtype</b> | N8-1296F: TCCATGYTTTGGGTTGARATGAT<br>N8 1423R: GCTCCATCRTGCCAYGACCA<br>N8 A354-Probe: FAM-TCHAGYAGCTCCATTGTRATGTGTGGAGT-TAMRA            | <a href="#">[3]</a> |
| <b>IBV</b>            | AIBV-fr: ATGCTCAACCTTGTCCCTAGCA<br>AIBV-as: TCAAAGTGCAGATCATCACGT<br>AIBV-TM: FAM-TTGAAGTAGAGTGACGCCCCAACTTCA-TAMRA                      | <a href="#">[5]</a> |
| <b>NDV</b>            | F+4839: TCCGGAGGATACAAGGGTCT<br>F-4939: AGCTGTTGCAACCCCAAG<br>F+4894: FAM-AAGCGTTTCTGTCTCCTTCCTCCA-TAMRA                                 | <a href="#">[6]</a> |
| <b>ILTV</b>           | ILTVgCU771: CCTTGCGTTTGAATTTTCTGT<br>ILTVgCL873: TTCGTGGGTTAGAGGTCTGT<br>ILTVprobe817: FAM-CAGCTCGGTGACCCCATCTA-MGBNFQ                   | <a href="#">[7]</a> |

|             |                                                                                                          |                     |
|-------------|----------------------------------------------------------------------------------------------------------|---------------------|
| <b>WNV</b>  | WNV10668: CAGACCACGCTACGGCG<br>WNV11770: CTAGGGCCGCGTGGG<br>WNV10692: FAM-TCTGCGGAGAGTGCAGTCTGCGAT-TAMRA | <a href="#">[8]</a> |
| <b>IBDV</b> | F/AUS GU: TCACCG TCCTCAGCTTACCCACATC<br>R/AUS GL: GGATTGGGATCAGCTCGAAGTTGC                               | <a href="#">[9]</a> |

**Supplementary table S2.** Primers used in Reverse Transcriptase-Polymerase Chain Reaction (RT-PCR) for sequencing.

FLI= Friedrich-Loeffler-Institut; NLQP= The National laboratory for quality control on poultry production; SEPRL= The Southeast Poultry Research Laboratory.

| Primer ID    | Nucleotide Sequence                              | Reference               |
|--------------|--------------------------------------------------|-------------------------|
| PB2 Primers  |                                                  |                         |
| PB2-1FV2     | 5'GGAAAGCAGGTCAAATATATTCAATA 3'                  | FLI                     |
| PB2-F1361    | 5'ATTGATAATGTCATGGGGATG 3'                       | NLQP                    |
| PB2-1421R    | 5' GGT AAT AAT CCG ATC ATC CCC AT 3'             | NLQP                    |
| PB2-F-1775   | 5'TAG TAC CAA AGG CTG CCA GA 3'                  | NLQP                    |
| PB2-1RV2     | 5'GGTCGTTTTTAAACAATTCGACAC 3'                    | FLI                     |
| PB2-R828     | 5'TCTCCAGCAGTGATGCCAGTG 3'                       | NLQP                    |
| PB1 Primers  |                                                  |                         |
| PB1-2FV3     | 5'AGCAGGCAAACCATTTGAATGG3'                       | FLI                     |
| PB1-2F -1100 | 5'AC ACA AAT ACC AGC AGA AAT GCT 3'              | NLQP                    |
| PB1-F-1433   | 5'GCA AGC TAG TCG GAA TCA A 3'                   | NLQP                    |
| Pb1 R-867    | 5'CAC GAC GTT TGC CAA TTT AGC C 3'               | NLQP                    |
| PB1-1230R    | 5'ATGTTGAACATGCCCATCATCAT3'                      | NLQP                    |
| PB1-R-2300   | 5'TTC ATG AAG GAC AAG CTA A 3'                   | NLQP                    |
| PA Primers   |                                                  |                         |
| PA -3FV2     | 5'AGC GAA AGC AGG TAC TGA TTC AAA A 3'           | FLI                     |
| PA+734       | 5'AACCGAACGGCTGCATTGA 3'                         | NLQP                    |
| PA-1131F     | 5'ACT CGG TGA GAA CAT GGC ACC3'                  | NLQP                    |
| PA-F1825     | 5'ACATGACCAAAGAATTCTTTGA3'                       | NLQP                    |
| PA -1312R    | 5'CTC CTA TTT CAT CAA GTT CTA TCC 3'             | NLQP                    |
| PA-R-1621    | 5'CTT TTC CCA CTT GTG TGG CTC C3'                | NLQP                    |
| PA-R-2193    | 5'ATA GTA GCA TTG CCA CAA CTA 3'                 | NLQP                    |
| HA Primers   |                                                  |                         |
| Bm-NS-890R   | -ATA TCG TCT CGT ATT AGT AGG AAA CAA GGG TGT TTT | <a href="#">[10,11]</a> |
| Bm-HA-1-     | TAT TCG TCT CAG GGA GCA AAA GCA GGG G            |                         |
| KH3-         | TAC CAA CCG TCT ACC ATK CCYTG                    |                         |
| KH1-         | CCTCCAGARTATGCMTAYAAAATTGTC                      |                         |
| 4FV2         | AGCAGGGGTTCAATCTGTCAAAA                          |                         |
| 4RV2         | AGTAGAAACAAGGGTGTTTTTAACTA                       |                         |
| NP Primers   |                                                  |                         |

|                     |                                                        |                         |
|---------------------|--------------------------------------------------------|-------------------------|
| <b>NP-5FV2</b>      | 5'CA CCG AGT GAC ATC AAC ATC A3'                       | <b>FLI</b>              |
| <b>NP-F370</b>      | 5'GAT AAT CAC TCA CCG AGT GAC ATC3'                    | <b>NLQP</b>             |
| <b>NP-5RV2</b>      | 5'AAG GGT ATT TTT CTT TAA TTG TCA T A C3'              | <b>FLI</b>              |
| <b>NP-R764</b>      | 5'TCC ATC ATT GCT CTT TGT3'                            | <b>NLQP</b>             |
| <b>NA Primers</b>   |                                                        |                         |
| <b>6FV2</b>         | <b>AGCAAAAGCAGGAGTTTAAAATGA</b>                        | <a href="#">[10,11]</a> |
| <b>BA-NA-1</b>      | <b>TAT TGG TCT CAG GGA GCA AAA GCA GGA GT</b>          |                         |
| <b>N1- 608-F</b>    | <b>AAT AAC AGA CAC CAT CAA GAG TTG</b>                 |                         |
| <b>BaNA-1413-R-</b> | <b>ATA TGG TCT CGT ATT AGT AGA AAC AAG GAG TTT TTT</b> |                         |
| <b>N1-R-720 -</b>   | <b>CAT GCA CAT TCA GAC TCT TG</b>                      |                         |
| <b>6RV2-</b>        | <b>TAGAAACAAGGAGTTTTTTGAACAAAC</b>                     |                         |
| <b>M Primers</b>    |                                                        |                         |
| <b>M-7FV2</b>       | <b>5'CAAAAGCAGGTAGATGTTGAAAGA 3'</b>                   | <b>FLI</b>              |
| <b>M-7RV2</b>       | <b>5'AACAAGGTAGTTTTTTACTCCAATTC 3'</b>                 | <b>FLI</b>              |
| <b>M-F710</b>       | <b>5'GTTCTTGAAAATTTGCAGG C 3'</b>                      | <b>NLQP</b>             |
| <b>M-R424</b>       | <b>5'GTTGTATGAGACCCATGC 3'</b>                         | <b>NLQP</b>             |
| <b>NS Primers</b>   |                                                        |                         |
| <b>NS-8FV2</b>      | <b>5'AAA AGC AGG GTG ACA AAG ACA TAA 3'</b>            | <b>FLI</b>              |
| <b>NS-8RV2</b>      | <b>5'AGT AGA AAC AAG GGT GTT TTT TAT CA 3'</b>         | <b>FLI</b>              |
| <b>NS-R598</b>      | <b>5'GAG TTA TCA TTC CAT TCA AGT CC 3'</b>             | <b>SEPRL</b>            |
| <b>NS-F327</b>      | <b>5'GACTGG TTC ATG CTC ATG CC 3'</b>                  | <b>SEPRL</b>            |

**Table S3.** Epidemiological data and GenBank accession number of detected avian influenza viruses

|   | Strain name                      | Collection date | Location | Genbank Accession number                                                                        |
|---|----------------------------------|-----------------|----------|-------------------------------------------------------------------------------------------------|
| 1 | A/Greater-Flamingo/Egypt/25/2021 | October 2021    | Ismailia | OP413044; <u>OP413049</u>                                                                       |
| 2 | A/Common-Blackbird/Egypt/26/2021 | November 2021   | Damietta | OP413045; <u>OP413050</u>                                                                       |
| 3 | A-Ibis-Egypt-RLQP-229S-2022-H5N1 | January 2022    | Giza     | <u>OP491851; OP491852; OP491854 ;OP491855;</u><br><u>OP491860; OP491856; OP491857; OP491859</u> |
| 4 | A/Red-back-shrike/Egypt/30/2022  | March 2022      | Damietta | OP413046; <u>OP413051</u>                                                                       |
| 5 | A/Greater-Flamingo/Egypt/31/2022 | March 2022      | Damietta | OP413047; <u>OP413052</u>                                                                       |
| 6 | A/Marbled-Duck/Egypt/32/2022     | March 2022      | Damietta | OP413048; <u>OP413053</u>                                                                       |

**Supplementary Figure S1** Phylogenetic analyses of the PB2(a), PB1(b), PA(c), NP(d), M(e), and NS(f) gene segments.

Phylogenetic trees include representative strains from recent H5N1 subtypes from both Eurasian and North American lineages; in addition to representative H5N1 (clade 2.2.1.2) strains from Egypt and other influenza virus subtypes showing a high nucleotide similarity. The Egyptian HPAI H5N1 strain sequenced in this study is colored in blue. Bootstrap values are shown on main nodes in the phylogenetic tree

**a-PB2**

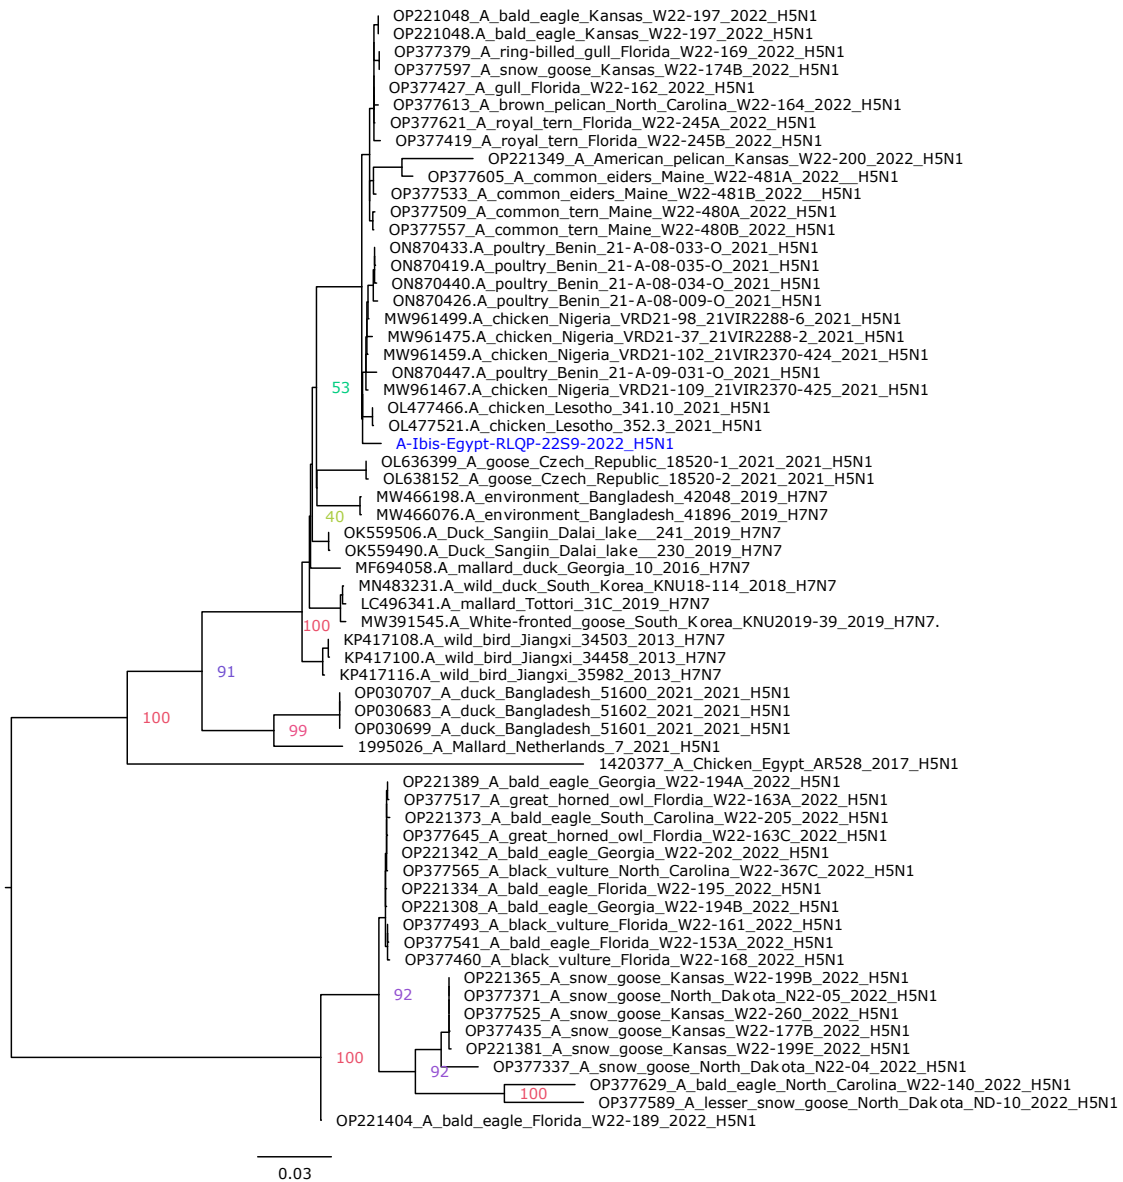

**b-PB1**

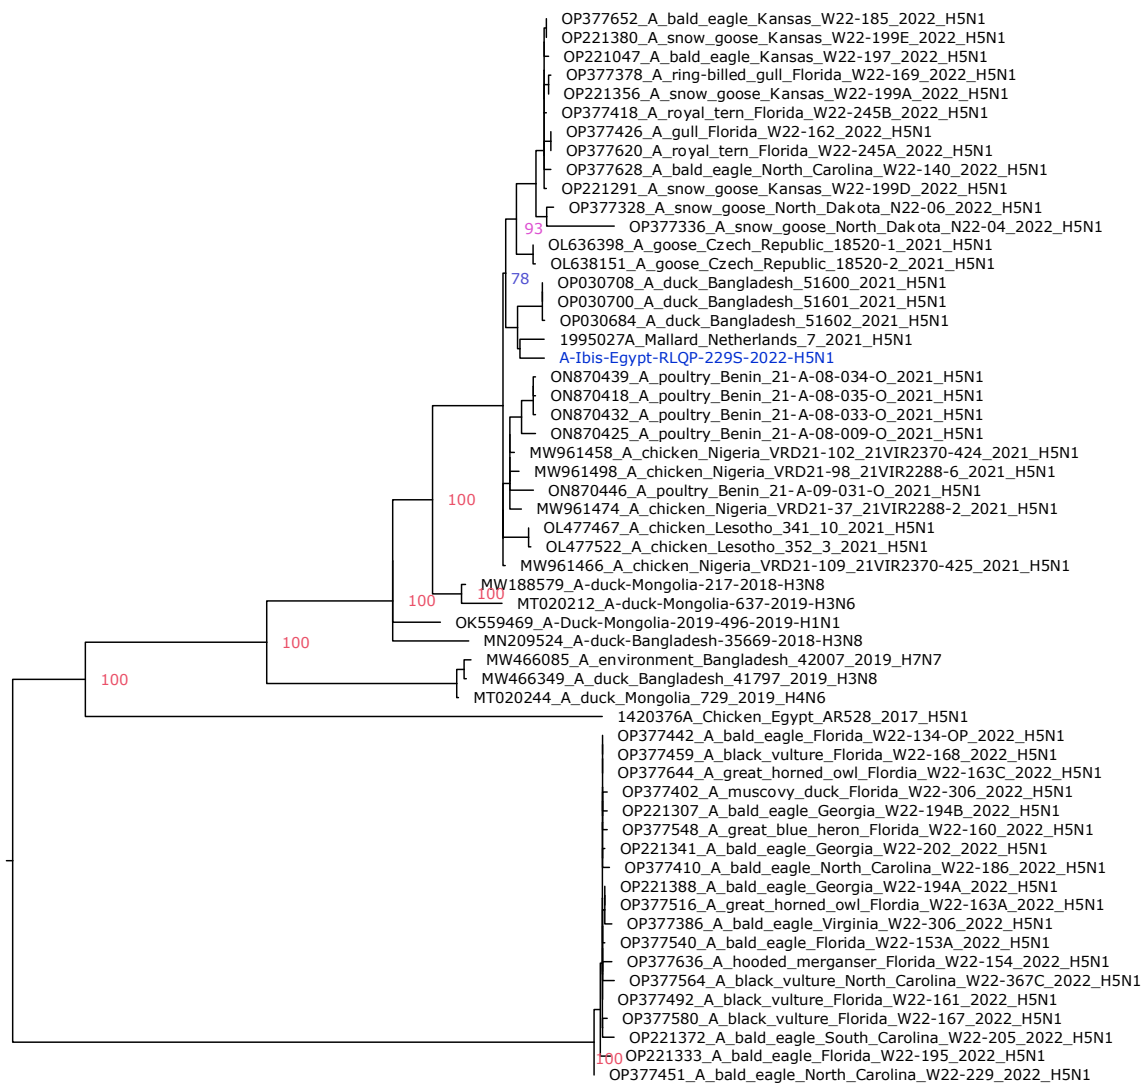

---

0.02

# c-PA

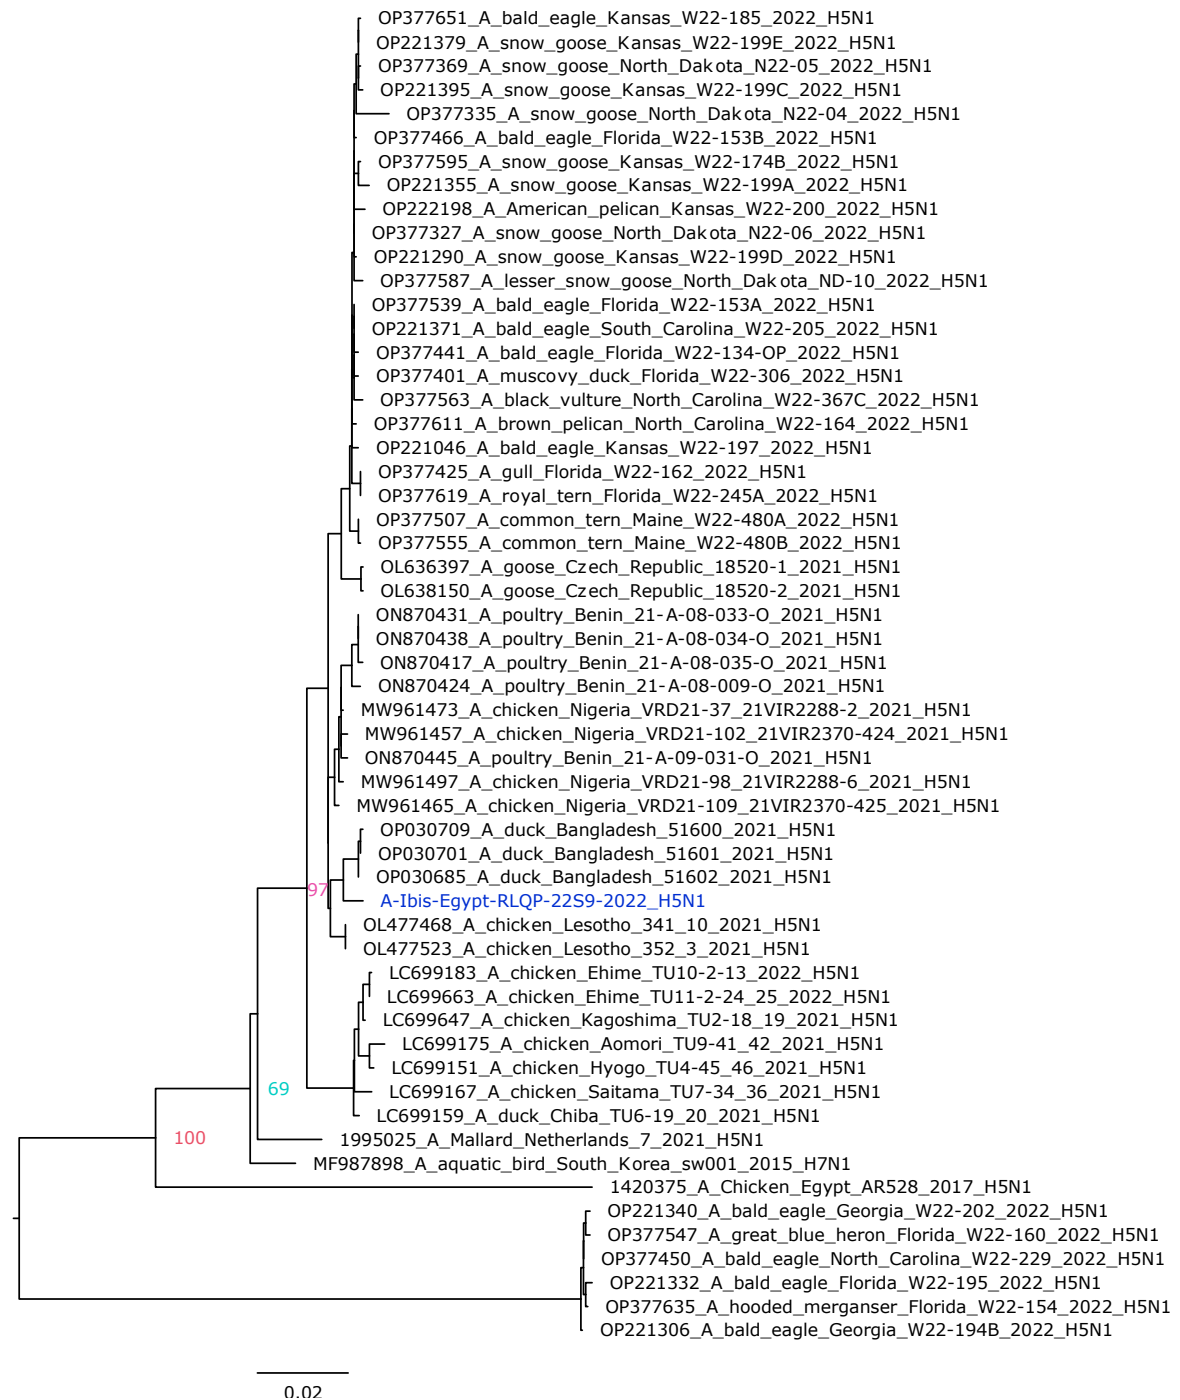

## d-NP

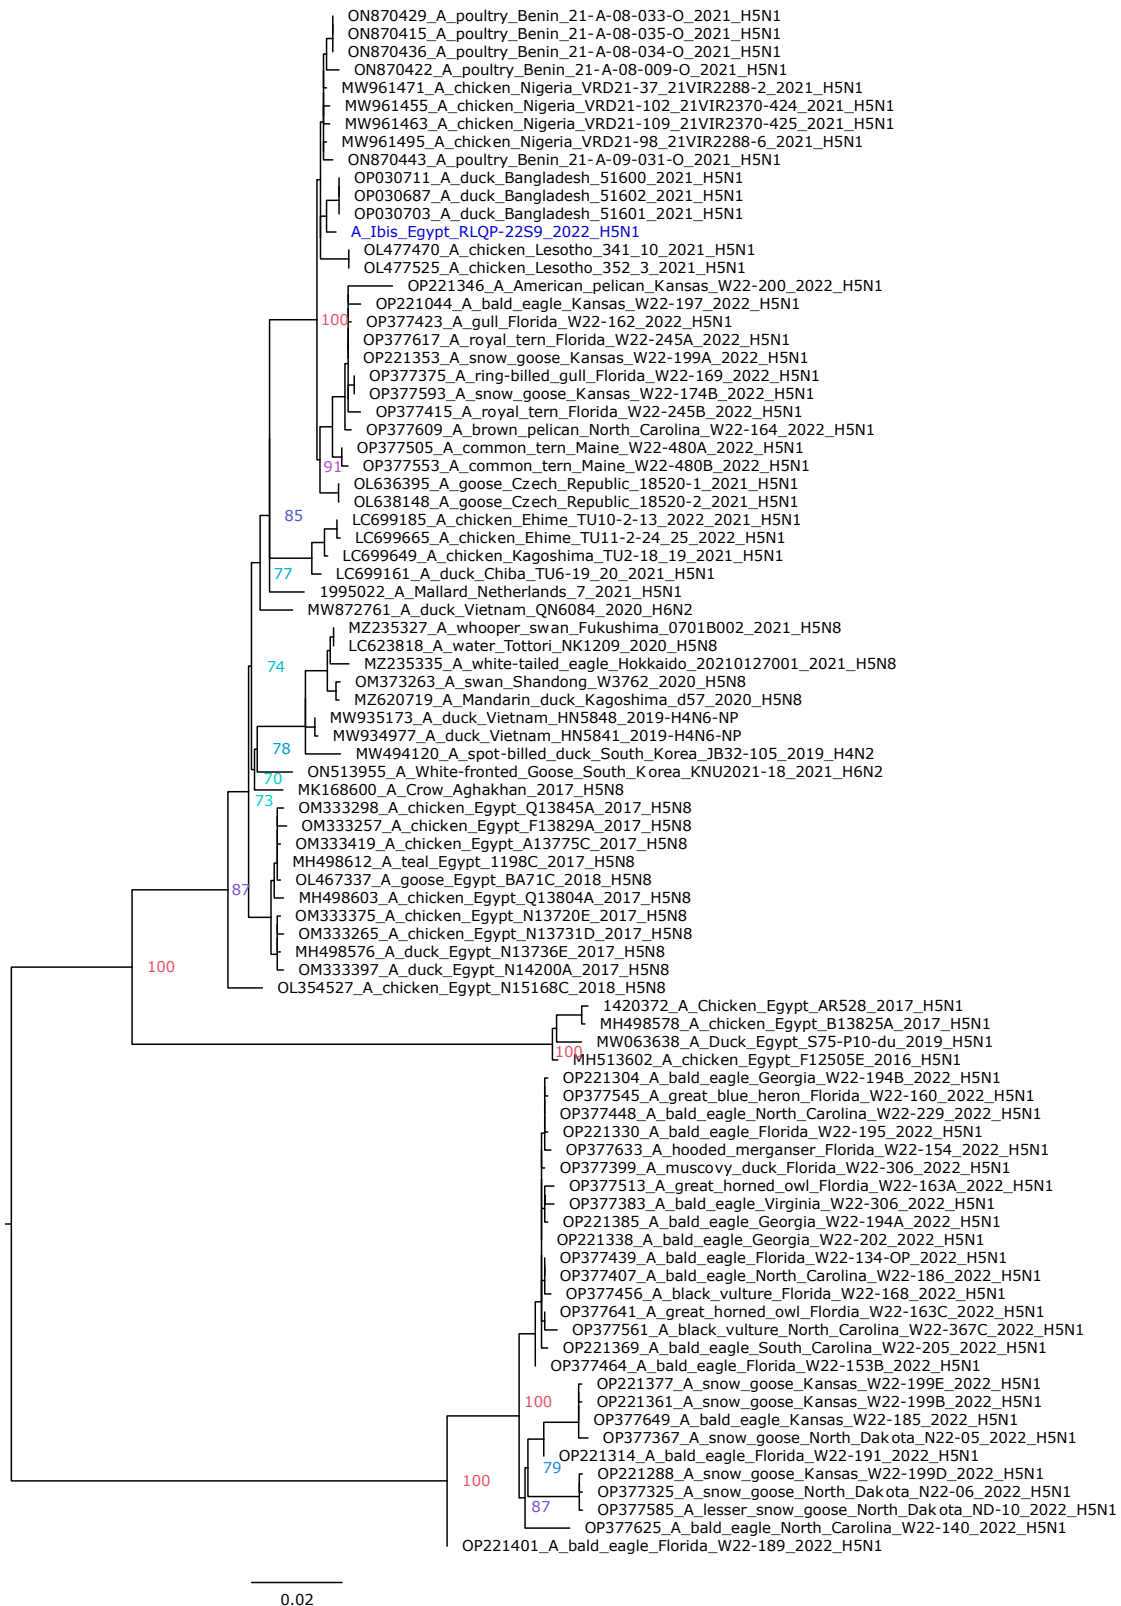

e-M

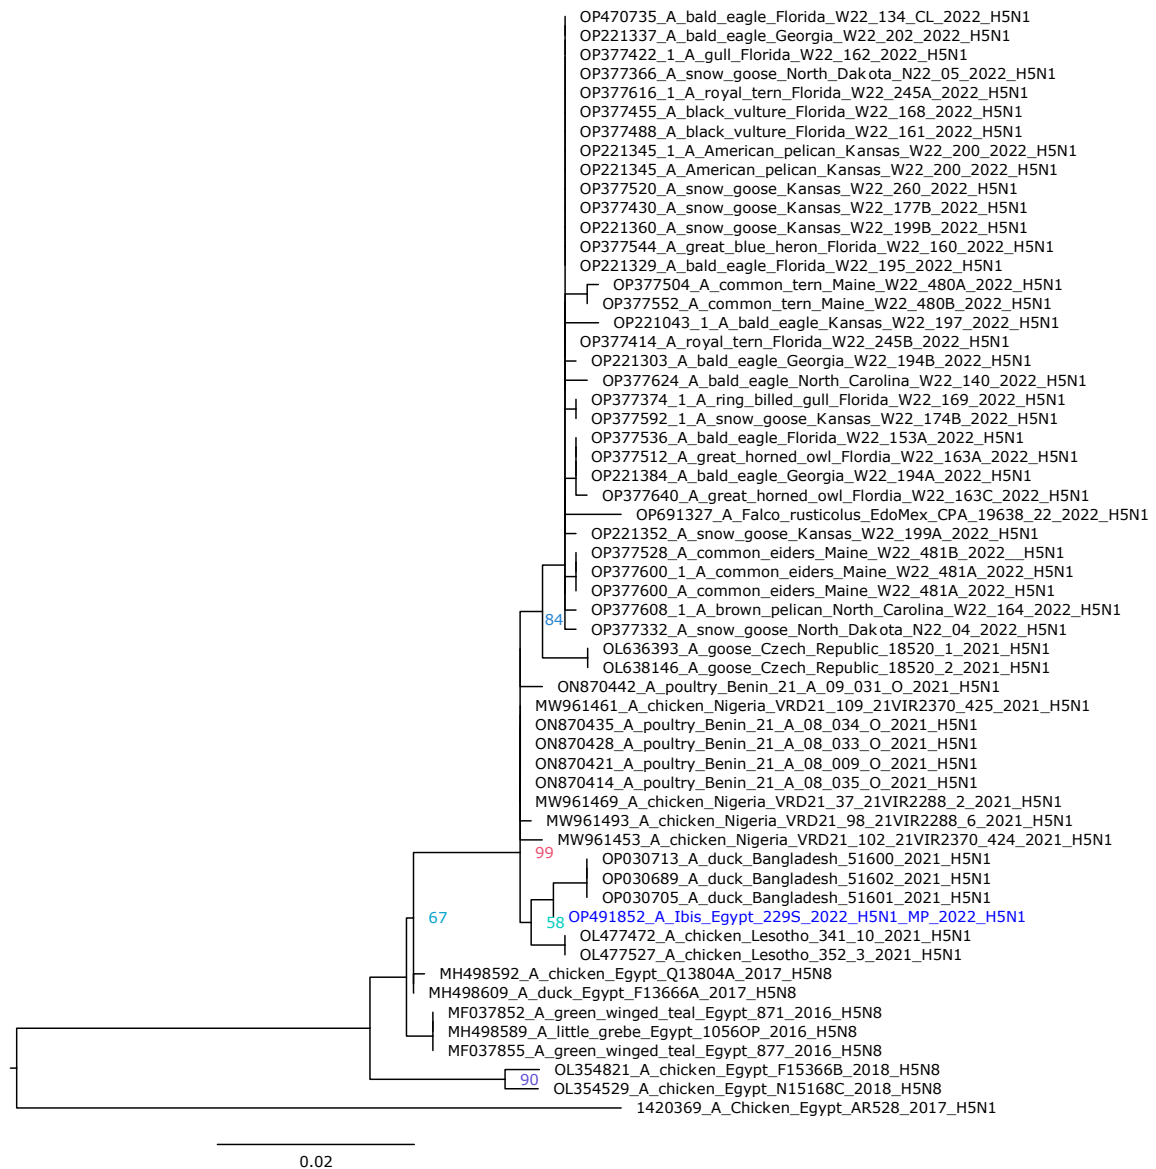

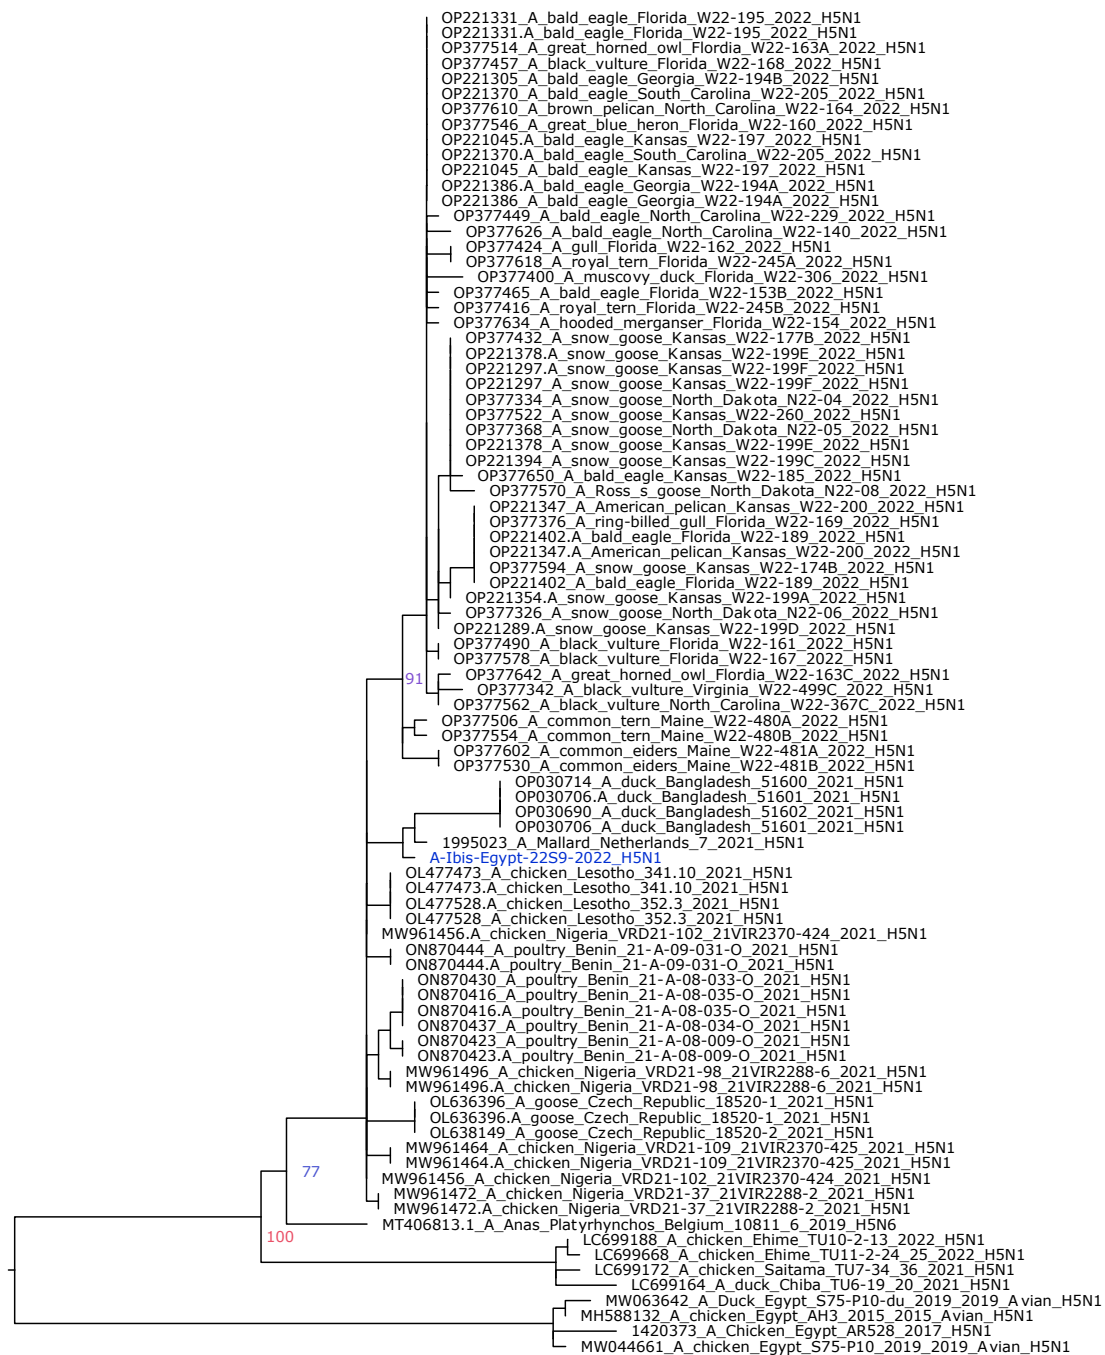

## Reference:

1. Spackman, E.; Senne, D.A.; Myers, T.; Bulaga, L.L.; Garber, L.P.; Perdue, M.L.; Lohman, K.; Daum, L.T.; Suarez, D.L. Development of a real-time reverse transcriptase PCR assay for type A influenza virus and the avian H5 and H7 hemagglutinin subtypes. *Journal of clinical microbiology* **2002**, *40*, 3256-3260.
2. Slomka, M.; Pavlidis, T.; Banks, J.; Shell, W.; McNally, A.; Essen, S.; Brown, I. Validated H5 Eurasian real-time reverse transcriptase–polymerase chain reaction and its application in H5N1 outbreaks in 2005–2006. *Avian diseases* **2007**, *51*, 373-377.
3. Hoffmann, B.; Hoffmann, D.; Henritzi, D.; Beer, M.; Harder, T.C. Riems influenza a typing array (RITA): An RT-qPCR-based low density array for subtyping avian and mammalian influenza a viruses. *Scientific reports* **2016**, *6*, 1-10.
4. Ben Shabat, M.; Meir, R.; Haddas, R.; Lapin, E.; Shkoda, I.; Raibstein, I.; Perk, S.; Davidson, I. Development of a real-time TaqMan RT-PCR assay for the detection of H9N2 avian influenza viruses. *Journal of virological methods* **2010**, *168*, 72-77, doi:10.1016/j.jviromet.2010.04.019.
5. Meir, R.; Maharat, O.; Farnushi, Y.; Simanov, L. Development of a real-time TaqMan® RT-PCR assay for the detection of infectious bronchitis virus in chickens, and comparison of RT-PCR and virus isolation. *Journal of virological methods* **2010**, *163*, 190-194.
6. Wise, M.G.; Suarez, D.L.; Seal, B.S.; Pedersen, J.C.; Senne, D.A.; King, D.J.; Kapczynski, D.R.; Spackman, E. Development of a real-time reverse-transcription PCR for detection of Newcastle disease virus RNA in clinical samples. *Journal of Clinical Microbiology* **2004**, *42*, 329-338.
7. Mo, J.; Angelichio, M.; Gow, L.; Leathers, V.; Jackwood, M.W. Quantitative real-time PCR assays for the concurrent diagnosis of infectious laryngotracheitis virus, Newcastle disease virus and avian metapneumovirus in poultry. *Journal of Veterinary Science* **2022**, *23*.
8. Herman, N. Real-Time Rt-Pcr Assays To Detect West Nile Virus In Mosquito Pools. Yale University, 2015.
9. Metwally, A.; Yousif, A.; Shaheed, I.; Mohammed, W.; Samy, A.; Reda, I. Re-emergence of very virulent IBDV in Egypt. *International journal of virology* **2009**, *5*, 1-17.
10. Hoffmann, E.; Stech, J.; Guan, Y.; Webster, R.; Perez, D. Universal primer set for the full-length amplification of all influenza A viruses. *Archives of virology* **2001**, *146*, 2275-2289.
11. Mady, W.; Yehia, N.; Elhussieny, M.H.; Shalaby, A.G.; El Sayed, M.M.; Bakry, N.R.; Shaaban, A.; Arafa, A.S.; Mahmoud, A.A.B.; Hassan, W.M. Genetic characterization of highly pathogenic avian influenza virus (H5N8) in backyard poultry production sector during Mid-2017 to autumn 2018. *Hosts and Viruses* **2019**, *6*, 75.
